# Supplementary material for: Evaluation of an Accelerated Workflow for Surveillance of ESBL (CTX-M)-Producing Escherichia coli Using Amplicon-Based Next-Generation Sequencing and Automated Analysis
Source: MDPI journal article supplement (doi:10.3390/microorganisms6010006), 2018-01-11
Supplement: s1 [file s1]

Table S1. Comparison of different DNA isolation methods.

| <b>Comparison 1</b> | <b>Isolation Method</b> | <b>Total # of samples</b> | <b># of samples tested postive</b> | <b>Total # of reads</b> |
|---------------------|-------------------------|---------------------------|------------------------------------|-------------------------|
|                     | MoBio                   | 12                        | 12                                 | 2756250                 |
|                     | bioMerieux              | 12                        | 5                                  | 2359974                 |
| <b>Comparison 2</b> | <b>Isolation Method</b> | <b>Total # of samples</b> | <b># of samples tested postive</b> | <b>Total # of reads</b> |
|                     | MoBio                   | 12                        | 12                                 | 1840428                 |
|                     | Qiagen                  | 12                        | 8                                  | 262843                  |
